# Supplementary material for: Preliminary Study on the Protective Effects and Molecular Mechanism of Procyanidins against PFOS-Induced Glucose-Stimulated Insulin Secretion Impairment in INS-1 Cells
Source: MDPI journal article supplement (doi:10.3390/toxics11020174), 2023-02-14
Supplement: s1 [file s1]

# Supplemental Files

**Table S1.** Main experimental materials, reagents and instruments.

| Materials                                                   | Source Information                                                                                               |
|-------------------------------------------------------------|------------------------------------------------------------------------------------------------------------------|
| INS-1 cells                                                 | Cell Resource Center of Shanghai Institutes of Biological Sciences, Chinese Academy of Sciences, Shanghai, China |
| RPMI-1640 basal medium                                      | Biological Industries, Beth Haemek, Israel                                                                       |
| Fetal bovine serum (FBS)                                    |                                                                                                                  |
| Penicillin–streptomycin solution                            |                                                                                                                  |
| Trypsin                                                     |                                                                                                                  |
| D-glucose                                                   | Beijing Solarbio Science & Technology Co., Ltd., Beijing, China                                                  |
| Sodium pyruvate                                             |                                                                                                                  |
| β-mercaptoethanol                                           |                                                                                                                  |
| PFOS (CASRN: 1763-23-1, lot: 33607, purity: ≥99%)           |                                                                                                                  |
| Procyanidins (CASRN: 4852-22-6, lot: S0208A, purity: ≥95%)  | Sigma-Aldrich, St. Louis, MO, USA                                                                                |
| 0.22 μm syringe filter                                      | Melone Pharmaceutical Co., Ltd., Dalian, China                                                                   |
| Whole-cell lysis buffer                                     | Millipore Corp, Billerica, MA, USA                                                                               |
| Cell Counting Kit-8                                         | NanJing KeyGen Biotech Co., Ltd., Nanjing, China                                                                 |
| BCA Protein Quantitation Kit                                |                                                                                                                  |
| ROS Detection Kit                                           | RayBiotech, Norcross, GA, USA                                                                                    |
| Rat Insulin ELISA Kit                                       |                                                                                                                  |
| RNAsimple Total RNA Kit                                     | TIANGEN Biotech (Beijing) Co., Ltd., Beijing, China                                                              |
| FastKing gDNA Dispelling RT SuperMix Kit                    |                                                                                                                  |
| Real Universal Color Premix (SYBR Green) Kit                | Beijing Zhongshan Jinqiao Biotechnology Co., Ltd., Beijing, China                                                |
| Horseradish peroxidase-labeled IgG                          |                                                                                                                  |
| Rabbit anti-β-actin polyclonal antibody                     | Abcam, Cambridge, MA, USA                                                                                        |
| Rabbit anti-insulin monoclonal antibody                     |                                                                                                                  |
| Primers                                                     | Sangon Biotech (Shanghai) Co., Ltd., Shanghai, China                                                             |
| CO <sub>2</sub> incubator (HERAcell 240i)                   | Thermo Fisher Scientific, Waltham, MA, USA                                                                       |
| Multiskan Spectrum (Multiskan GO)                           |                                                                                                                  |
| Ultramicro ultraviolet spectrophotometer (NanoDrop One)     |                                                                                                                  |
| Electrophoresis system (Mini-PROTEAN Tetra Cell)            |                                                                                                                  |
| Real-time PCR detection system (CFX Connect Thermal Cycler) | Bio-Rad, Hercules, CA, USA                                                                                       |
| Enhanced chemiluminescence detection system                 | PerkinElmer, Norwalk, CT, USA                                                                                    |
| Multimode plate reader (VICTOR Nivo)                        |                                                                                                                  |

**Table S2.** Primer's sequences.

| <b>Gene</b>    | <b>GenBank No.</b> | <b>Forward primers (5'–3')</b> | <b>Reverse primers (5'–3')</b> | <b>Amplification product size</b> |
|----------------|--------------------|--------------------------------|--------------------------------|-----------------------------------|
| <i>β-actin</i> | NM_031144.3        | GACTACCTCATG<br>AAGATCCTGACC   | TCTCTTTAATGT<br>CACGCACGATT    | 85bp                              |
| <i>Glut2</i>   | NM_012879.2        | CGGCTGTCTCTGT<br>GCTGCTTGT     | GCCGTCATGCT<br>CACATAACTCA     | 151bp                             |
| <i>Gck</i>     | NM_012565.2        | GCTTTTGAGACC<br>CGTTTCGT       | CGCACAATGTC<br>GCAGTCG         | 119bp                             |
| <i>Insulin</i> | NM_019130.2        | TCTTCTACACAC<br>CCATGTCCC      | GGTGCAGCACT<br>GATCCAC         | 149bp                             |

## Methods

### Molecular docking simulation

The protein structures were downloaded from the UniProt database and RCSB PDB database (<http://www.rcsb.org/pdb>), and the SDF format of PFOS was downloaded from PubChem (<https://pubchem.ncbi.nlm.nih.gov/>) and converted into Mol2 format in Open Babel. PyMOL software was used to remove water molecules and small molecule ligands in protein, and the AutoDockTools1.5.6 was used for molecular docking of PFOS and protein. The binding energy was calculated by AutoGrid. In order to improve the accuracy of calculation, the parameter "number of GA runs" was set to 50, the output method was set to Lamarckian genetic algorithm, and the rest of the parameters were set as default values. Subsequently, the small molecules in the optimal conformation after docking were compared with the small molecules of the original ligand. When the root mean square deviation (RMSD) were less than 2Å, it was considered that the docking method was feasible and the results were credible.

## Results

### Molecular docking results of PFOS with the proteins encoded by *GCK*, *GLUT2*, and *INSR* (insulin receptor) genes

The results of molecular docking showed that PFOS could bind to the protein molecule encoded by *GCK* (*Homo sapiens*) and form hydrogen bonds with Arg-35, Agr-36, and Lys-32 near the active site when the binding energy (less than -1.2 kcal/mol) and RMSD value (less than 2Å) were considered at the same time (Table S3 and Figure S1).

**Table S3.** Molecular docking results of PFOS with proteins encoded by *GCK*, *GLUT2*, and *INSR* genes

| Gene Name                                 | Protein ID (UniProt/RCSB PDB) | Binding Energy (kcal/mol) | RMSD (Å)         |
|-------------------------------------------|-------------------------------|---------------------------|------------------|
| <i>Gck</i> ( <i>Rattus norvegicus</i> )   | AF-P17712-F1 (no ligand) / —  | -1.66                     | —                |
| <i>Gck</i> ( <i>Mus musculus</i> )        | AF-P52792-F1 (no ligand) / —  | -2.12                     | —                |
| <i>GCK</i> ( <i>Homo Sapiens</i> )        | 4dch                          | -3                        | 1.401            |
| <i>Glut2</i> ( <i>Rattus norvegicus</i> ) | AF-P12336-F1 (no ligand) / —  | -2.02                     | —                |
| <i>Glut2</i> ( <i>Mus musculus</i> )      | AF-P14246-F1 (no ligand) / —  | -2.76                     | —                |
| <i>GLUT2</i> ( <i>Homo Sapiens</i> )      | AF-P11168-F1 (no ligand) / —  | —                         | —                |
| <i>Insr</i> ( <i>Rattus norvegicus</i> )  | — / 4xst                      | — / -2.57                 | — / 2.408        |
| <i>Insr</i> ( <i>Mus musculus</i> )       | AF-P15208-F1 (no ligand) / —  | —                         | —                |
| <i>INSR</i> ( <i>Homo Sapiens</i> )       | — / 1i44, 5hhw                | — / -2.46, -3.24          | — / 2.313, 3.001 |

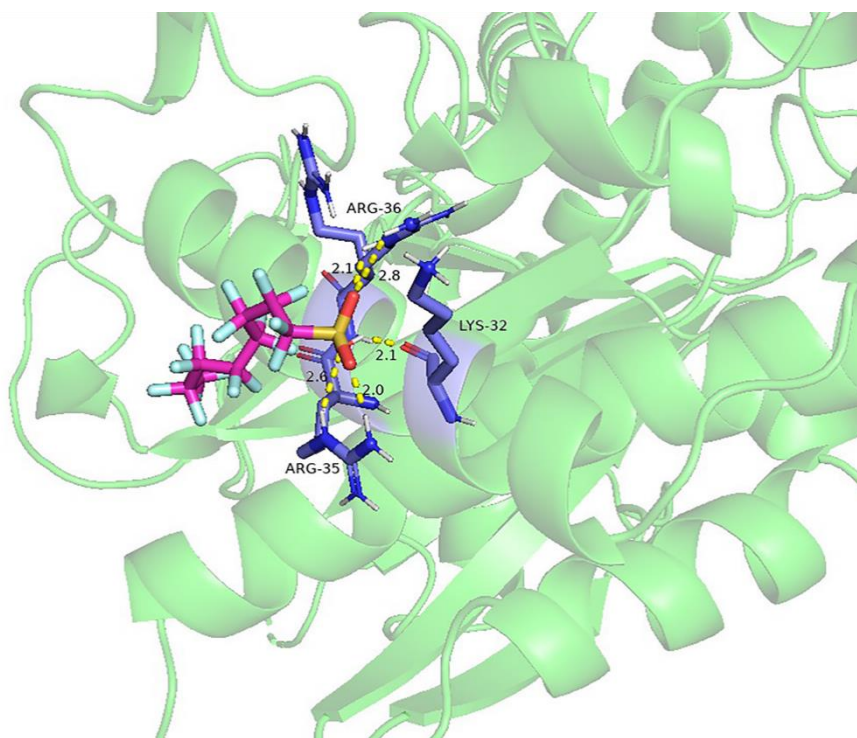

**Figure S1.** Molecular docking results of PFOS with the protein encoded by *GCK* (*Homo Sapiens*). PFOS is shown as sticks (C: magenta, F: cyan, S: yellow, O: red, H: white). The protein encoded by *GCK* is shown as a green helix. The amino acid residues of the protein are shown as marine-blue sticks. The hydrogen bonds are indicated by yellow dotted lines.
